# Supplementary material for: Combined obeticholic acid and elafibranor treatment promotes additive liver histological improvements in a diet-induced ob/ob mouse model of biopsy-confirmed NASH
Source: PubMed Central journal article supplement (PMC6588626; doi:10.1038/s41598-019-45178-z), 2019-06-21
Supplement: 41598_2019_45178_MOESM1_ESM.pdf [file 41598_2019_45178_MOESM1_ESM.pdf]

## SUPPLEMENTARY INFORMATION

**Combined obeticholic acid and elafibranor treatment promotes additive liver histological improvements in a diet-induced *ob/ob* mouse model of biopsy-confirmed NASH**

Jonathan D Roth<sup>1</sup>, Sanne S Veidal<sup>2</sup>, Louise KD Fensholdt<sup>2</sup>, Kristoffer TG Rigbolt<sup>2</sup>, Romeo Papazyan<sup>1</sup>, Jens Christian Nielsen<sup>2</sup>, Michael Feigh<sup>2</sup>, Niels Vrang<sup>2</sup>, Mark Young<sup>1</sup>, Jacob Jelsing<sup>2</sup>, Luciano Adorini<sup>1</sup>, Henrik H Hansen<sup>2\*</sup>

<sup>1</sup>Intercept Pharmaceuticals, San Diego, CA; <sup>2</sup>Gubra, Hørsholm, Denmark

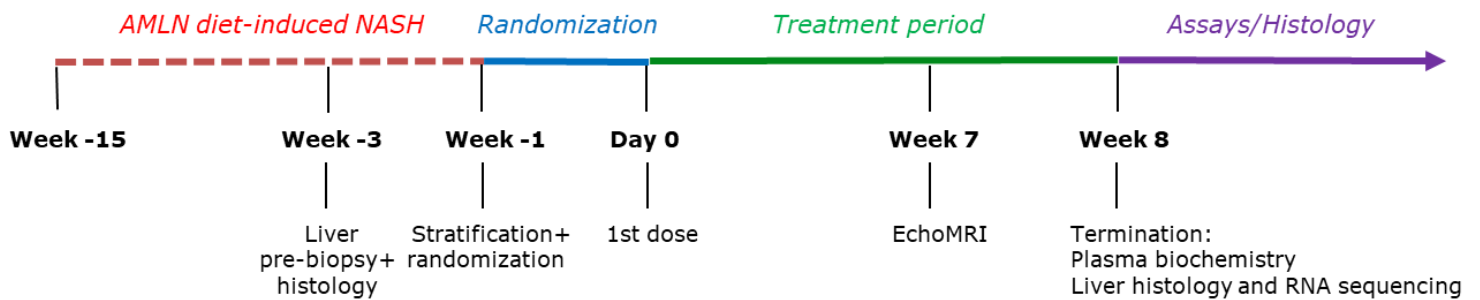

**Supplementary Figure S1. Study outline.** 6 weeks old *ob/ob* mice were fed the AMLN diet for 15 weeks prior to dosing start (day 0). A liver pre-biopsy was sampled in all AMLN *ob/ob*-NASH mice at three weeks prior to treatment start (week -3). Individual histopathology was evaluated for stratification of baseline NASH severity before dosing start. Animals were stratified and randomized to treatment groups based on mean fibrosis level (collagen 1a1 immunostaining, fractional area), then body weight (measured one week prior to treatment start, week -1). Body weight was monitored daily and 24h food intake was assessed once weekly during the treatment period. Body composition was analyzed in treatment week 7 by non-invasive EchoMRI scanning. Plasma biochemistry analysis was applied to terminal plasma samples from non-fasted mice. Liver histology was compared on all paired pre-biopsy and terminal samples, allowing for within-subject analysis of histological changes following 8 weeks of drug treatment. RNA sequencing was performed on terminal liver samples.

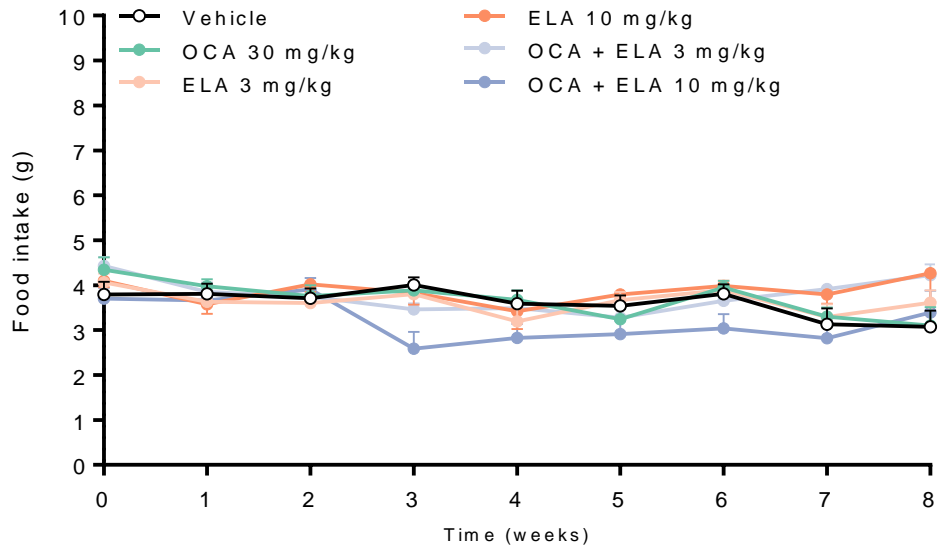

**Supplementary Figure S2. Food intake in AMLN *ob/ob*-NASH mice treated with obeticholic acid (OCA), elafibranor (ELA) and combinations.** Food intake was measured once weekly. Treatments had no effect on weekly food intake (overall  $p > 0.05$ , two-way ANOVA with Tukey's multiple comparisons test).

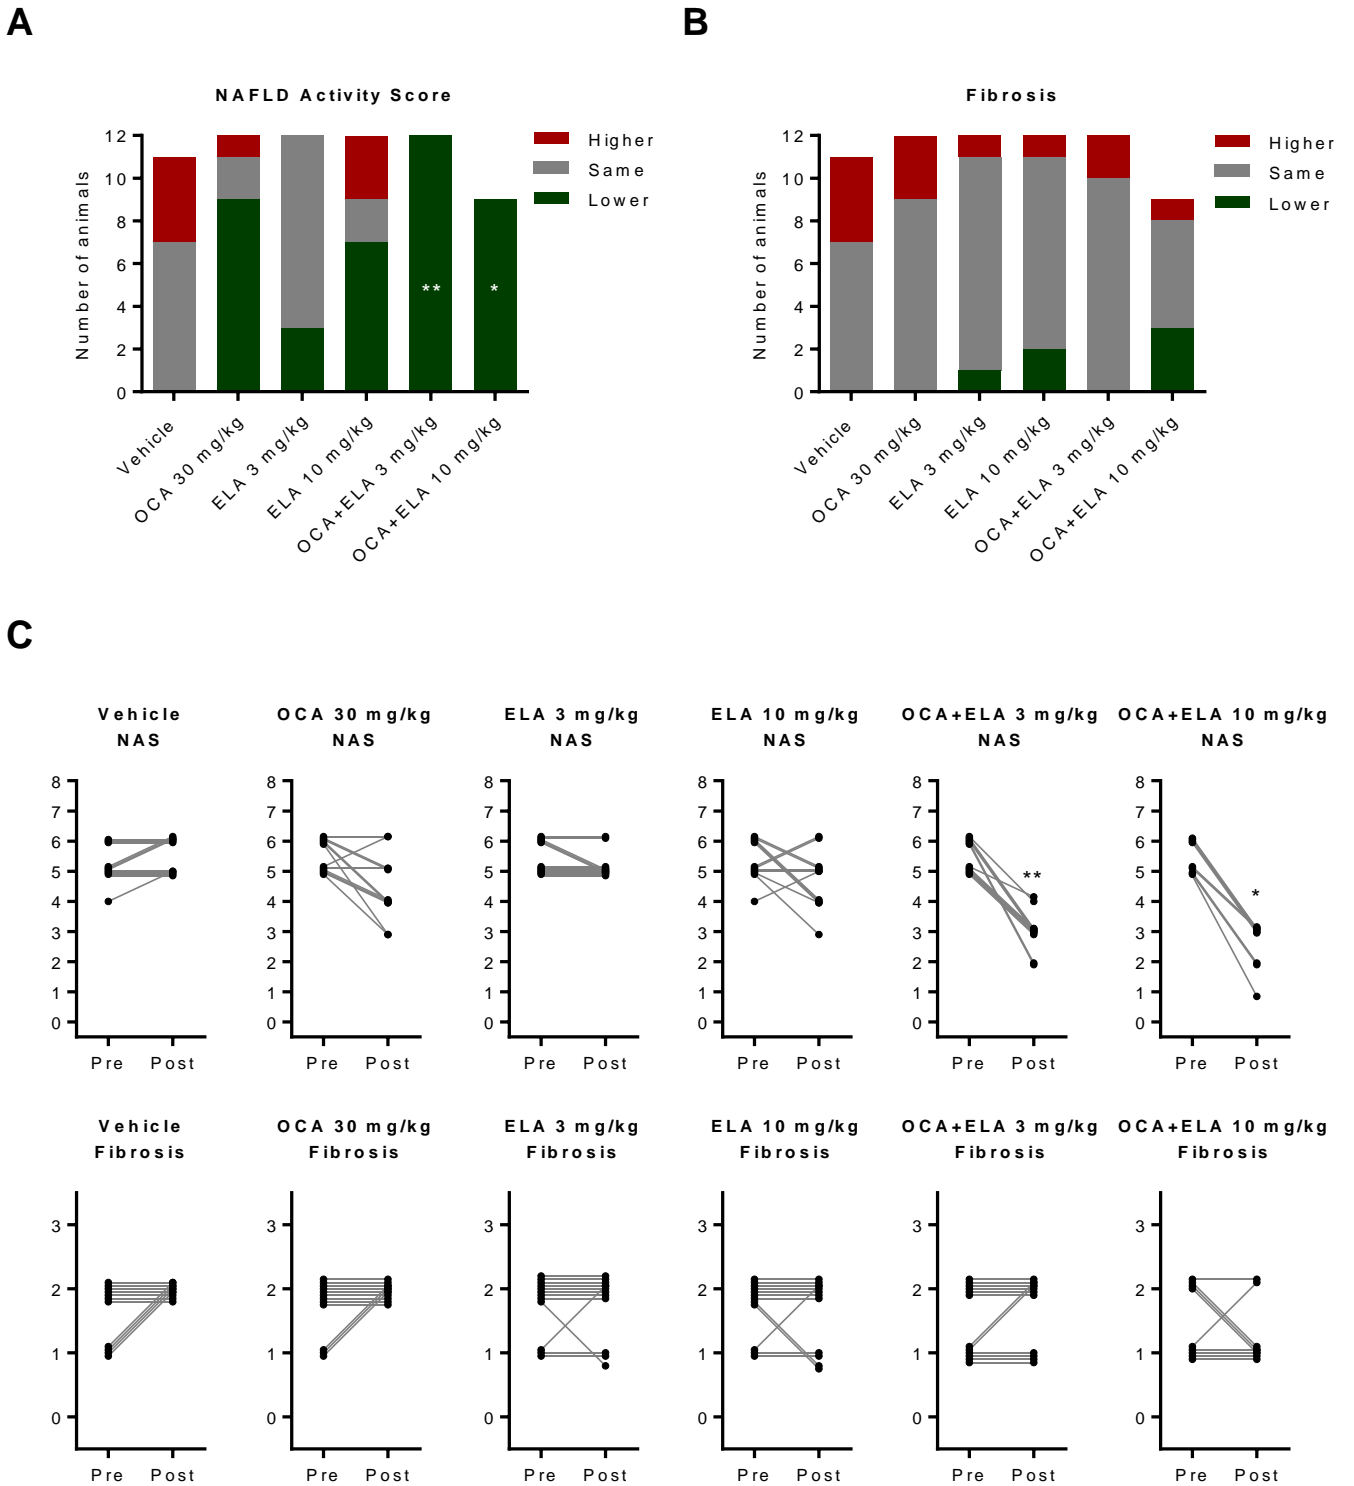

**Supplementary Figure S3. Histomorphometric effects of obeticholic acid (OCA), elafibranor (ELA) and combinations in AMLN *ob/ob*-NASH mice.** (A) Changes in NAFLD activity score, (B) Changes in fibrosis score, (C) Individual NAS and fibrosis scores. The NAFLD activity score (NAS) and fibrosis staging system was applied to paired liver pre-biopsy and terminal samples as outlined by Kleiner *et al.* (*Hepatology* 41: 1313-1321, 2005). Fisher's exact test with Bonferroni correction was used to test for within-subject changes in histology scores before and after treatment, compared to vehicle controls. \* $p < 0.05$ , \*\* $p < 0.01$ .

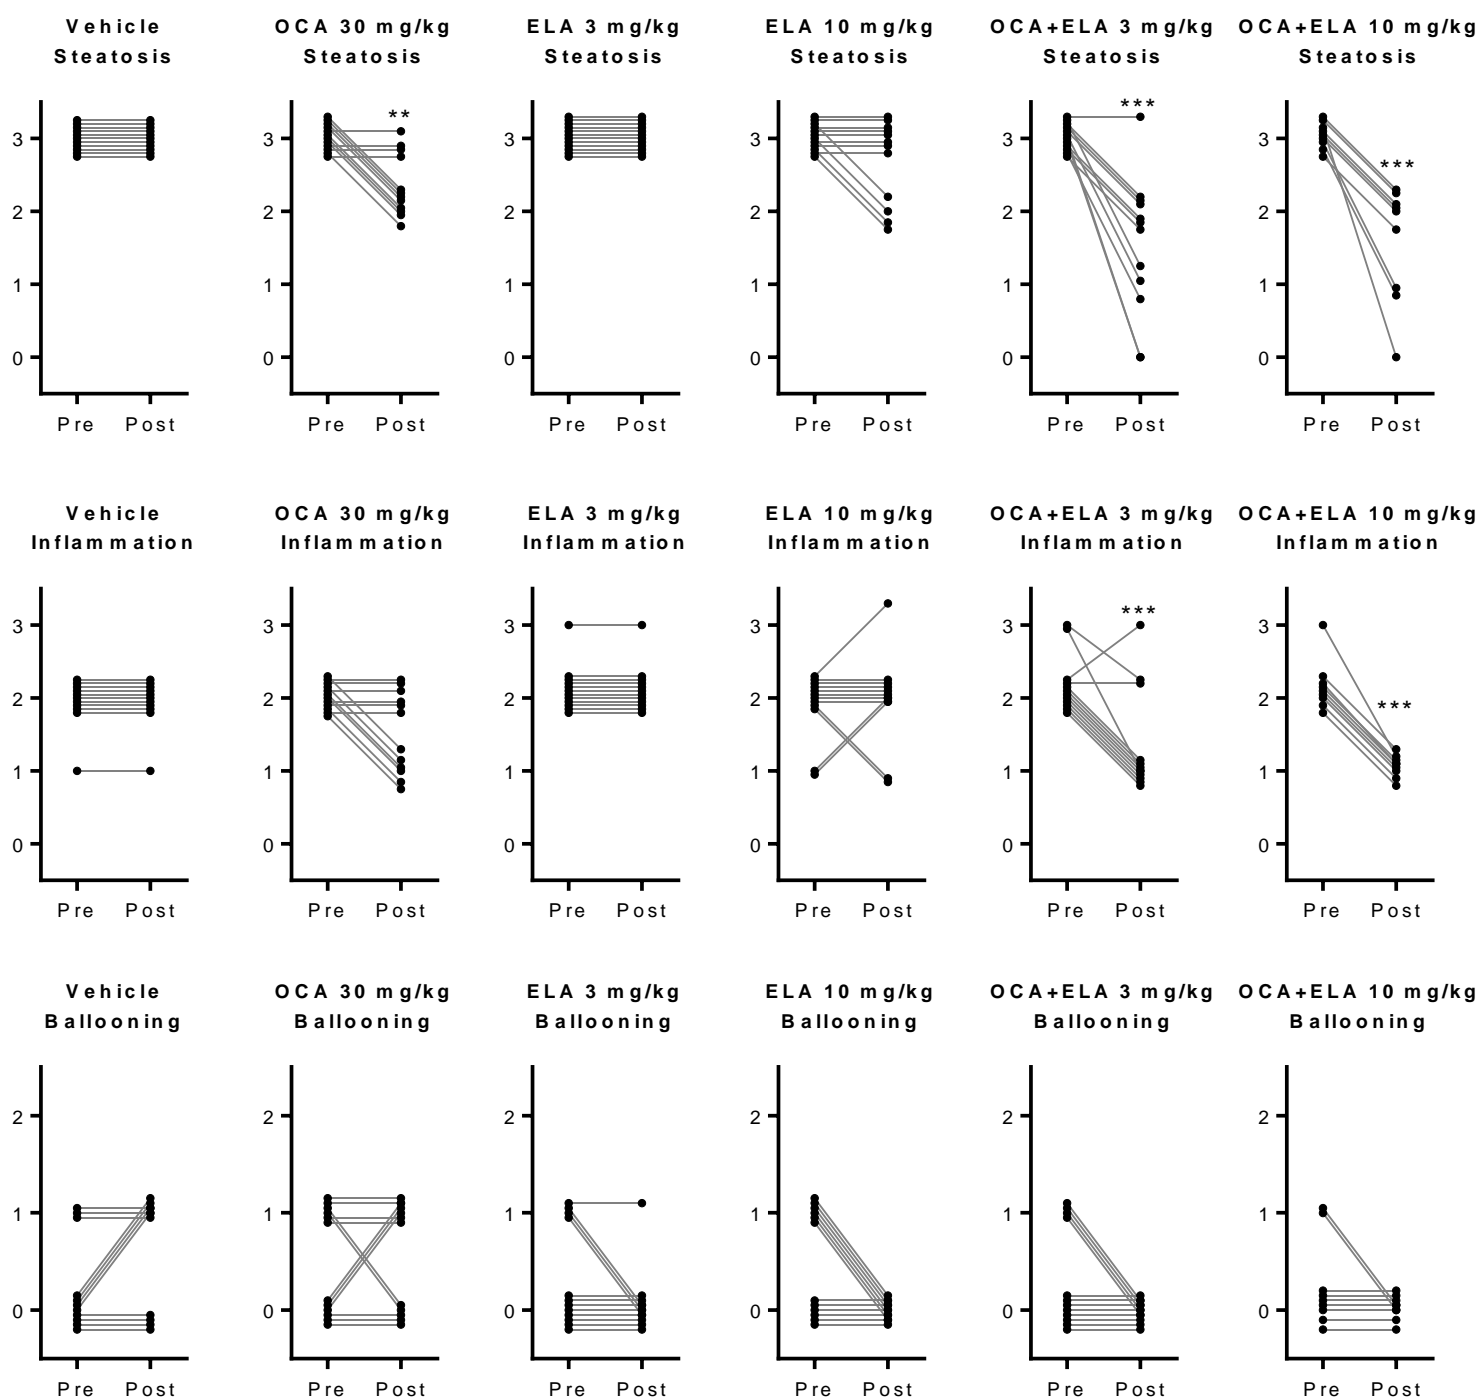

**Supplementary Figure S4. Histomorphometric effects of obeticholic acid (OCA), elafibranor (ELA) and combinations in AMLN *ob/ob*-NASH mice.** The NAFLD activity score (NAS) and fibrosis staging system was applied to paired liver pre-biopsy and terminal samples for scoring of steatosis, lobular inflammation and hepatocyte ballooning as outlined by Kleiner *et al.* (Hepatology 41: 1313-1321, 2005). Fisher's exact test was used to test for within-subject changes in histology scores before and after treatment, compared to vehicle controls. \*p<0.05, \*\*p<0.01, \*\*\*p<0.001.

| Accession key   | Official symbol | Gene name | Gene set               | Description                                              |
|-----------------|-----------------|-----------|------------------------|----------------------------------------------------------|
| ENSG00000110090 | CPT1A           | CPT1      | Lipid metabolism       | carnitine palmitoyltransferase 1A                        |
| ENSG00000169710 | FASN            | FASN      | Lipid metabolism       | fatty acid synthase                                      |
| ENSG00000012504 | NR1H4           | FXR       | Lipid metabolism       | nuclear receptor subfamily 1 group H member 4            |
| ENSG00000186281 | GPAT2           | GPAT2     | Lipid metabolism       | glycerol-3-phosphate acyltransferase 2, mitochondrial    |
| ENSG00000158669 | GPAT4           | GPAT4     | Lipid metabolism       | glycerol-3-phosphate acyltransferase 4                   |
| ENSG00000113161 | HMGCR           | HMGCR     | Lipid metabolism       | 3-hydroxy-3-methylglutaryl-CoA reductase                 |
| ENSG00000112972 | HMGCS1          | HMGCS1    | Lipid metabolism       | 3-hydroxy-3-methylglutaryl-CoA synthase 1                |
| ENSG00000134240 | HMGCS2          | HMGCS2    | Lipid metabolism       | 3-hydroxy-3-methylglutaryl-CoA synthase 2                |
| ENSG00000130164 | LDLR            | LDLR      | Lipid metabolism       | low density lipoprotein receptor                         |
| ENSG00000123384 | LRP1            | LRP1      | Lipid metabolism       | LDL receptor related protein 1                           |
| ENSG00000186951 | PPARA           | PPARA     | Lipid metabolism       | peroxisome proliferator activated receptor alpha         |
| ENSG00000112033 | PPARD           | PPARD     | Lipid metabolism       | peroxisome proliferator activated receptor delta         |
| ENSG00000073060 | SCARB1          | SCARB1    | Lipid metabolism       | scavenger receptor class B member 1                      |
| ENSG00000099194 | SCD             | SCD1      | Lipid metabolism       | stearoyl-CoA desaturase                                  |
| ENSG00000104549 | SQLE            | SQLE      | Lipid metabolism       | squalene epoxidase                                       |
| ENSG00000198911 | SREBF2          | SREBF2    | Lipid metabolism       | sterol regulatory element binding transcription factor 2 |
| ENSG00000072310 | SREBF1          | SREBP1    | Lipid metabolism       | sterol regulatory element binding transcription factor 1 |
| ENSG00000142208 | AKT1            | AKT1      | Insulin signaling      | AKT serine/threonine kinase 1                            |
| ENSG00000126767 | ELK1            | ELK1      | Insulin signaling      | ELK1, ETS transcription factor                           |
| ENSG00000150907 | FOXO1           | FOXO1     | Insulin signaling      | forkhead box O1                                          |
| ENSG00000131482 | G6PC            | G6PASE    | Insulin signaling      | glucose-6-phosphatase catalytic subunit                  |
| ENSG00000229894 | GK3P            | GK        | Insulin signaling      | glycerol kinase 3 pseudogene                             |
| ENSG00000181856 | SLC2A4          | GLUT4     | Insulin signaling      | solute carrier family 2 member 4                         |
| ENSG00000177885 | GRB2            | GRB2      | Insulin signaling      | growth factor receptor bound protein 2                   |
| ENSG00000111713 | GYS2            | GYS2      | Insulin signaling      | glycogen synthase 2                                      |
| ENSG00000171105 | INSR            | INSR      | Insulin signaling      | insulin receptor                                         |
| ENSG00000169047 | IRS1            | IRS1      | Insulin signaling      | insulin receptor substrate 1                             |
| ENSG00000185950 | IRS2            | IRS2      | Insulin signaling      | insulin receptor substrate 2                             |
| ENSG00000100030 | MAPK1           | MAPK1     | Insulin signaling      | mitogen-activated protein kinase 1                       |
| ENSG00000102882 | MAPK3           | MAPK3     | Insulin signaling      | mitogen-activated protein kinase 3                       |
| ENSG00000169032 | MAP2K1          | MEK1      | Insulin signaling      | mitogen-activated protein kinase kinase 1                |
| ENSG00000126934 | MAP2K2          | MEK2      | Insulin signaling      | mitogen-activated protein kinase kinase 2                |
| ENSG00000124253 | PCK1            | PEPCK     | Insulin signaling      | phosphoenolpyruvate carboxykinase 1                      |
| ENSG00000163558 | PRKCI           | PKC       | Insulin signaling      | protein kinase C iota                                    |
| ENSG00000067606 | PRKCZ           | PKC       | Insulin signaling      | protein kinase C zeta                                    |
| ENSG00000100504 | PYGL            | PYG       | Insulin signaling      | phosphorylase, glycogen, liver                           |
| ENSG00000118137 | APOA1           | APOAI     | FXR signaling          | apolipoprotein A1                                        |
| ENSG00000110243 | APOA5           | APOAV     | FXR signaling          | apolipoprotein A5                                        |
| ENSG00000234906 | APOC2           | APOCII    | FXR signaling          | apolipoprotein C2                                        |
| ENSG00000110245 | APOC3           | APOCIII   | FXR signaling          | apolipoprotein C3                                        |
| ENSG00000083807 | SLC27A5         | BACS      | FXR signaling          | solute carrier family 27 member 5                        |
| ENSG00000167910 | CYP7A1          | CYP7A1    | FXR signaling          | cytochrome P450 family 7 subfamily A member 1            |
| ENSG00000180432 | CYP8B1          | CYP8B1    | FXR signaling          | cytochrome P450 family 8 subfamily B member 1            |
| ENSG00000005471 | ABCB4           | MDR3      | FXR signaling          | ATP binding cassette subfamily B member 4                |
| ENSG00000137204 | SLC22A7         | OAT2      | FXR signaling          | solute carrier family 22 member 7                        |
| ENSG00000186198 | SLC51B          | OSTB      | FXR signaling          | solute carrier family 51 beta subunit                    |
| ENSG00000131910 | NR0B2           | SHP       | FXR signaling          | nuclear receptor subfamily 0 group B member 2            |
| ENSG00000109181 | UGT2B10         | UGT2B4    | FXR signaling          | UDP glucuronosyltransferase family 2 member B10          |
| ENSG00000147852 | VLDLR           | VLDLR     | FXR signaling          | very low density lipoprotein receptor                    |
| ENSG00000197442 | MAP3K5          | ASK1      | Inflammation signaling | mitogen-activated protein kinase kinase kinase 5         |

|                 |          |        |                           |                                                       |
|-----------------|----------|--------|---------------------------|-------------------------------------------------------|
| ENSG00000170345 | FOS      | FOS    | Inflammation signaling    | Fos proto-oncogene, AP-1 transcription factor subunit |
| ENSG00000213341 | CHUK     | IKK    | Inflammation signaling    | conserved helix-loop-helix ubiquitous kinase          |
| ENSG00000107643 | MAPK8    | JNK    | Inflammation signaling    | mitogen-activated protein kinase 8                    |
| ENSG00000177606 | JUN      | JUN    | Inflammation signaling    | Jun proto-oncogene, AP-1 transcription factor subunit |
| ENSG00000109320 | NFKB1    | NF-KB  | Inflammation signaling    | nuclear factor kappa B subunit 1                      |
| ENSG00000185386 | MAPK11   | P38    | Inflammation signaling    | mitogen-activated protein kinase 11                   |
| ENSG00000175387 | SMAD2    | SMAD2  | Inflammation signaling    | SMAD family member 2                                  |
| ENSG00000166949 | SMAD3    | SMAD3  | Inflammation signaling    | SMAD family member 3                                  |
| ENSG00000141646 | SMAD4    | SMAD4  | Inflammation signaling    | SMAD family member 4                                  |
| ENSG00000105329 | TGFB1    | TGFB   | Inflammation signaling    | transforming growth factor beta 1                     |
| ENSG00000106799 | TGFBR1   | TGFBR  | Inflammation signaling    | transforming growth factor beta receptor 1            |
| ENSG00000136869 | TLR4     | TLR4   | Inflammation signaling    | toll like receptor 4                                  |
| ENSG00000232810 | TNF      | TNFA   | Inflammation signaling    | tumor necrosis factor                                 |
| ENSG00000067182 | TNFRSF1A | TNFR   | Inflammation signaling    | TNF receptor superfamily member 1A                    |
| ENSG00000127191 | TRAF2    | TRAF2  | Inflammation signaling    | TNF receptor associated factor 2                      |
| ENSG00000175104 | TRAF6    | TRAF6  | Inflammation signaling    | TNF receptor associated factor 6                      |
| ENSG00000163823 | CCR1     | CCR1   | Monocyte recruitment      | C-C motif chemokine receptor 1                        |
| ENSG00000121807 | CCR2     | CCR2   | Monocyte recruitment      | C-C motif chemokine receptor 2                        |
| ENSG00000170458 | CD14     | CD14   | Monocyte recruitment      | CD14 molecule                                         |
| ENSG00000177575 | CD163    | CD163  | Monocyte recruitment      | CD163 molecule                                        |
| ENSG00000129226 | CD68     | CD68   | Monocyte recruitment      | CD68 molecule                                         |
| ENSG00000174837 | ADGRE1   | F4/80  | Monocyte recruitment      | adhesion G protein-coupled receptor E1                |
| ENSG00000136634 | IL10     | IL-10  | Monocyte recruitment      | interleukin 10                                        |
| ENSG00000115008 | IL1A     | IL-1A  | Monocyte recruitment      | interleukin 1 alpha                                   |
| ENSG00000125538 | IL1B     | IL-1B  | Monocyte recruitment      | interleukin 1 beta                                    |
| ENSG00000131981 | LGALS3   | MAC-2  | Monocyte recruitment      | galectin 3                                            |
| ENSG00000108691 | CCL2     | MCP-1  | Monocyte recruitment      | C-C motif chemokine ligand 2                          |
| ENSG00000271503 | CCL5     | RANTES | Monocyte recruitment      | C-C motif chemokine ligand 5                          |
| ENSG00000163568 | AIM2     | AIM2   | Hepatocellular cell death | absent in melanoma 2                                  |
| ENSG00000137752 | CASP1    | CASP1  | Hepatocellular cell death | caspase 1                                             |
| ENSG00000164305 | CASP3    | CASP3  | Hepatocellular cell death | caspase 3                                             |
| ENSG00000138794 | CASP6    | CASP6  | Hepatocellular cell death | caspase 6                                             |
| ENSG00000138794 | CASP6    | CASP6  | Hepatocellular cell death | caspase 6                                             |
| ENSG00000165806 | CASP7    | CASP7  | Hepatocellular cell death | caspase 7                                             |
| ENSG00000064012 | CASP8    | CASP8  | Hepatocellular cell death | caspase 8                                             |
| ENSG00000150782 | IL18     | IL18   | Hepatocellular cell death | interleukin 18                                        |
| ENSG00000091106 | NLRC4    | IPAF   | Hepatocellular cell death | NLR family CARD domain containing 4                   |
| ENSG00000091592 | NLRP1    | NLRP1B | Hepatocellular cell death | NLR family pyrin domain containing 1                  |
| ENSG00000162711 | NLRP3    | NLRP3  | Hepatocellular cell death | NLR family pyrin domain containing 3                  |
| ENSG00000137275 | RIPK1    | RIP1   | Hepatocellular cell death | receptor interacting serine/threonine kinase 1        |
| ENSG00000129465 | RIPK3    | RIP3   | Hepatocellular cell death | receptor interacting serine/threonine kinase 3        |
| ENSG00000107796 | ACTA2    | A-SMA  | Stellate cell activation  | actin, alpha 2, smooth muscle, aorta                  |
| ENSG00000076706 | MCAM     | CD146  | Stellate cell activation  | melanoma cell adhesion molecule                       |
| ENSG00000108821 | COL1A1   | COL1A1 | Stellate cell activation  | collagen type I alpha 1 chain                         |
| ENSG00000164692 | COL1A2   | COL1A2 | Stellate cell activation  | collagen type I alpha 2 chain                         |
| ENSG00000168542 | COL3A1   | COL3A1 | Stellate cell activation  | collagen type III alpha 1 chain                       |
| ENSG00000130635 | COL5A1   | COL5A1 | Stellate cell activation  | collagen type V alpha 1 chain                         |
| ENSG00000204262 | COL5A2   | COL5A2 | Stellate cell activation  | collagen type V alpha 2 chain                         |
| ENSG00000080573 | COL5A3   | COL5A3 | Stellate cell activation  | collagen type V alpha 3 chain                         |
| ENSG00000142156 | COL6A1   | COL6A1 | Stellate cell activation  | collagen type VI alpha 1 chain                        |
| ENSG00000142173 | COL6A2   | COL6A2 | Stellate cell activation  | collagen type VI alpha 2 chain                        |
| ENSG00000163359 | COL6A3   | COL6A3 | Stellate cell activation  | collagen type VI alpha 3 chain                        |

|                 |       |       |                          |                                          |
|-----------------|-------|-------|--------------------------|------------------------------------------|
| ENSG00000138798 | EGF   | EGF   | Stellate cell activation | epidermal growth factor                  |
| ENSG00000131095 | GFAP  | GFAP  | Stellate cell activation | glial fibrillary acidic protein          |
| ENSG00000137745 | MMP13 | MMP13 | Stellate cell activation | matrix metalloproteinase 13              |
| ENSG00000087245 | MMP2  | MMP2  | Stellate cell activation | matrix metalloproteinase 2               |
| ENSG00000100985 | MMP9  | MMP9  | Stellate cell activation | matrix metalloproteinase 9               |
| ENSG00000197461 | PDGFA | PDGF  | Stellate cell activation | platelet derived growth factor subunit A |
| ENSG00000102265 | TIMP1 | TIMP1 | Stellate cell activation | TIMP metalloproteinase inhibitor 1       |
| ENSG00000035862 | TIMP2 | TIMP2 | Stellate cell activation | TIMP metalloproteinase inhibitor 2       |
| ENSG00000100234 | TIMP3 | TIMP3 | Stellate cell activation | TIMP metalloproteinase inhibitor 3       |
| ENSG00000157150 | TIMP4 | TIMP4 | Stellate cell activation | TIMP metalloproteinase inhibitor 4       |

**Supplementary Table S1.** Candidate genes associated with NAFLD and fibrosis.
